# Supplementary material
Source: PubMed Central journal article supplement (PMC3990429)

Supplement data

Fig.1

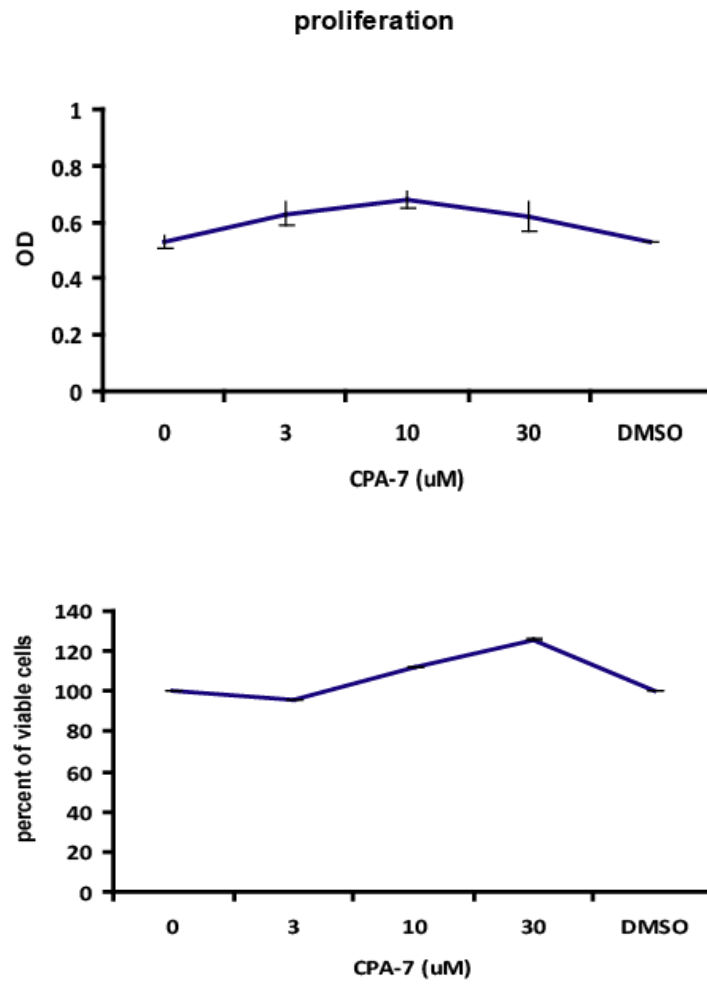

Fig. 2

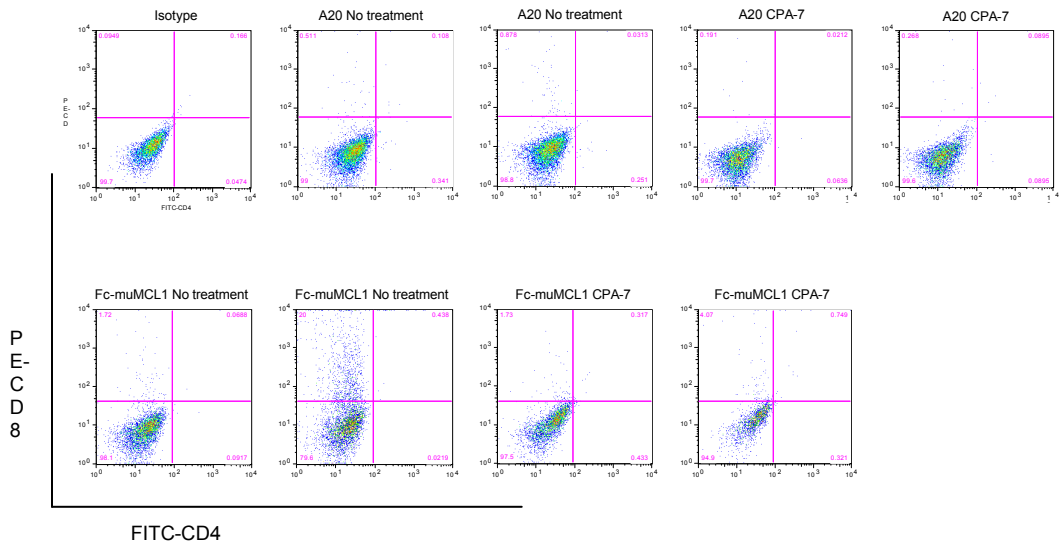

Supplement: NIHMS567128-supplement-supplement_1.pdf [file NIHMS567128-supplement-supplement_1.pdf]
